# Supplementary material for: The impact of cell culture media on the interaction of biopolymer-functionalized gold nanoparticles with cells: mechanical and toxicological properties
Source: Research Square preprint supplement (doi:10.21203/rs.3.rs-1671966/v1), 2022-06-01
Supplement: Supplementary file 1 [file 9f3fad1dfdd867783d36e667.docx]

Supporting Information

**The impact of cell culture media on the interaction of biopolymer-functionalized gold nanoparticles with cells: mechanical and toxicological properties**

Brahmaiah Meesaragandla,1,2 Yesaswini Komaragiri,2,3 Rabea Schlüter,4 Oliver Otto,2,3 and Mihaela Delcea1,2,3*

*1Institute of Biochemistry, University of Greifswald, Felix-Hausdorff-Straße 4, 17489 Greifswald, Germany*

*2ZIK HIKE - Zentrum für Innovationskompetenz „Humorale Immunreaktionen bei kardiovaskulären Erkrankungen“, Fleischmannstraße 42, 17489 Greifswald, Germany*

*3DZHK (Deutsches Zentrum für Herz-Kreislauf-Forschung), partner site Greifswald, Germany*

*4Imaging Center of the Department of Biology, University of Greifswald, Friedrich-Ludwig-Jahn-Str. 15, 17489 Greifswald, Germany.*

*Corresponding author, [delceam@uni-greifswald.de](mailto:delceam@uni-greifswald.de)

**Figure S1**. UV-Vis absorption spectra of different surface-functionalized AuNPs.

**Figure S2**. TEM images of AuNPs functionalized with citrate, dex-10, chitosan and dextrin molecules.

**Figure S3**. DLS and zeta potential data of AuNPs functionalized with citrate, dex-10, dextrin and chitosan ligands.

**Figure S4**. Zeta potential data of AuNPs in protein poor- and protein rich medium.

**Figure S5**. Osmolarity of protein poor- and protein rich CCM with different surface-functionalized AuNPs.

**Figure S6.** Time-dependent mechanical alterations of HL 60 cells in presence of AuNPs in RPMI without FCS.

**Figure S7.** Time dependent cytotoxicity results of HL 60 cells in presence of different surface-functionalized AuNP in RPMI media without FCS.


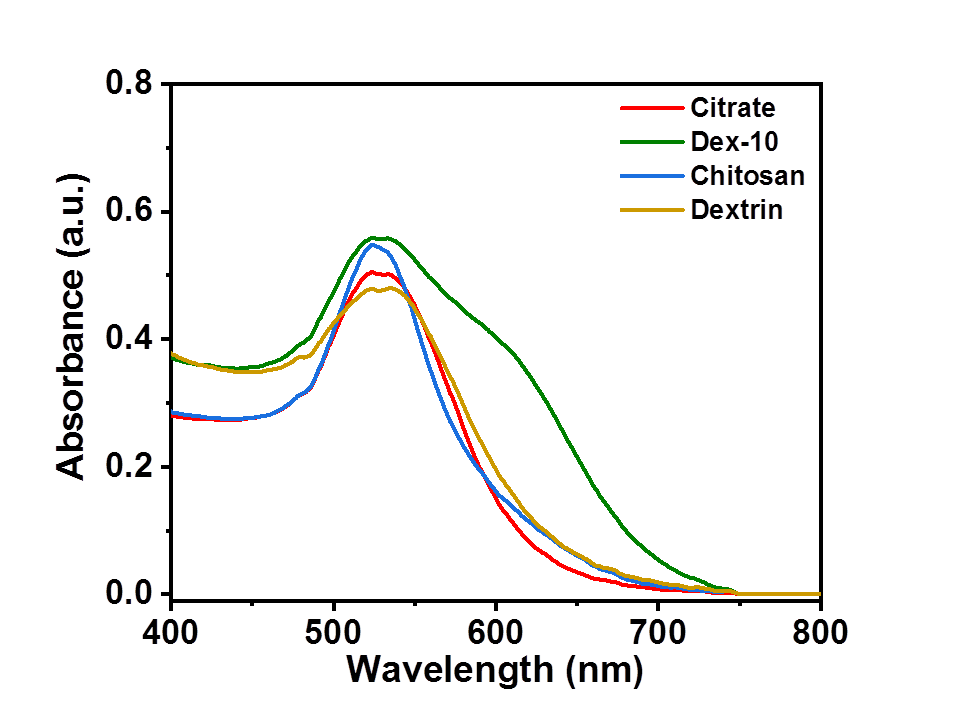


**Figure S1.** A) UV-Vis absorption spectra of AuNPs functionalized with citrate, dex-10, chitosan and dextrin ligands (AuNPs concentration = 100 nM).


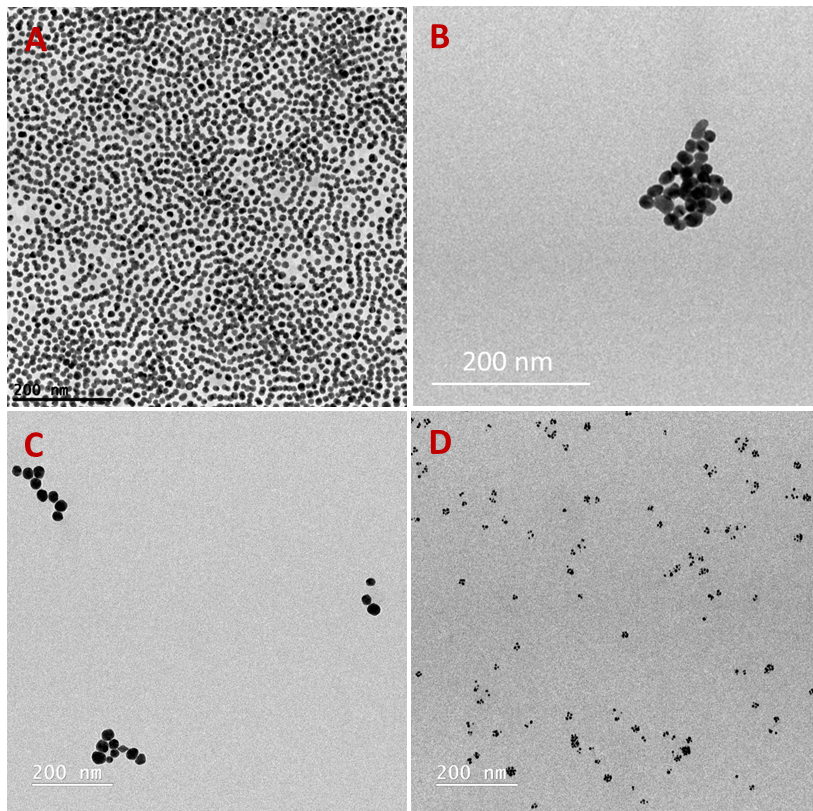


**Figure S2.** TEM images of AuNPs functionalized with citrate (A), dex-10 (B), chitosan (C) and dextrin (D) ligands.


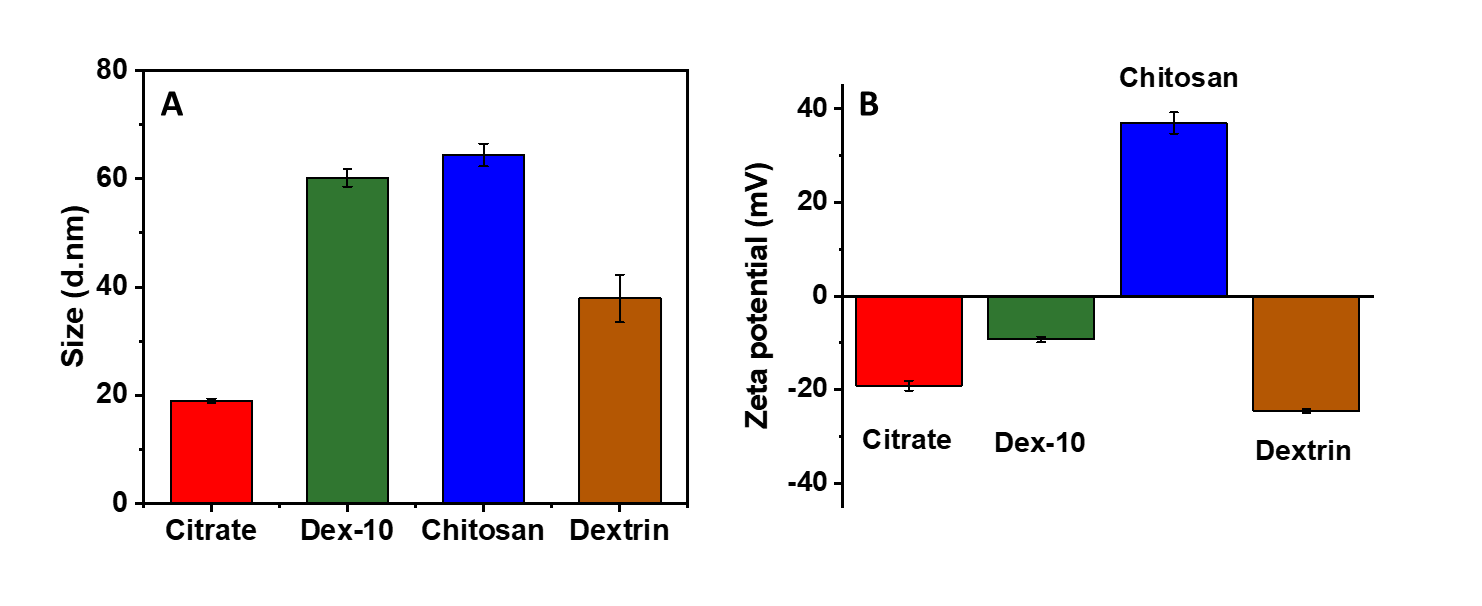


**Figure S3.** DLS (A) and zeta potential (B) data of biopolymer-functionalized AuNPs.

**
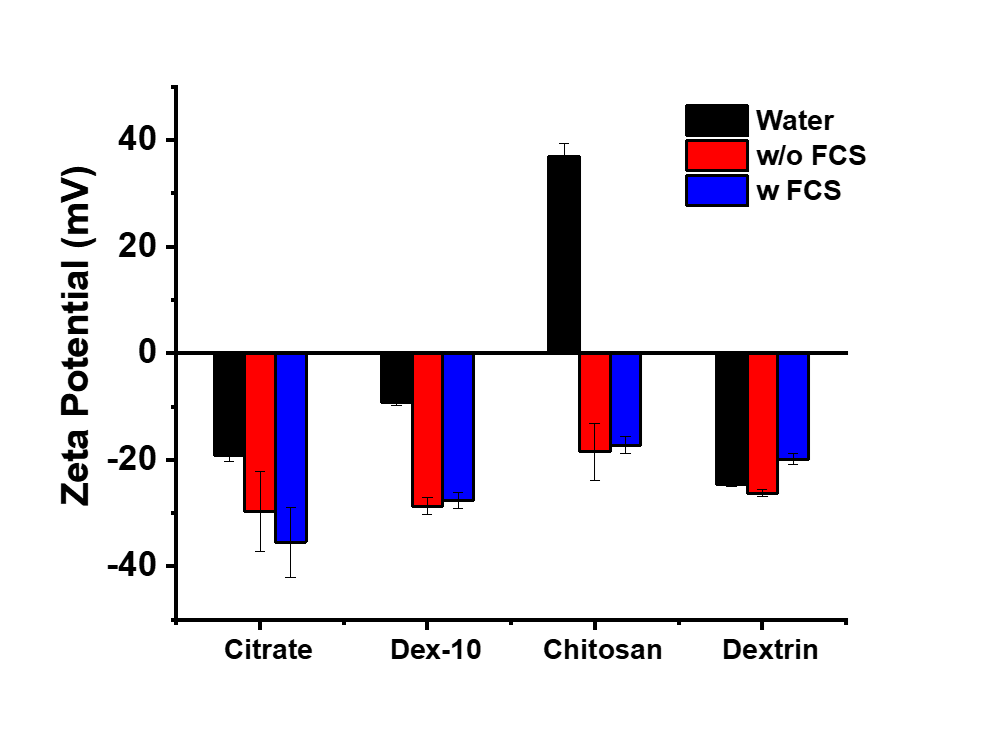
**

**Figure S4.** Charge distribution of different surface-functionalized AuNPs in protein poor- and rich media at 37 ºC after 24 h incubation.


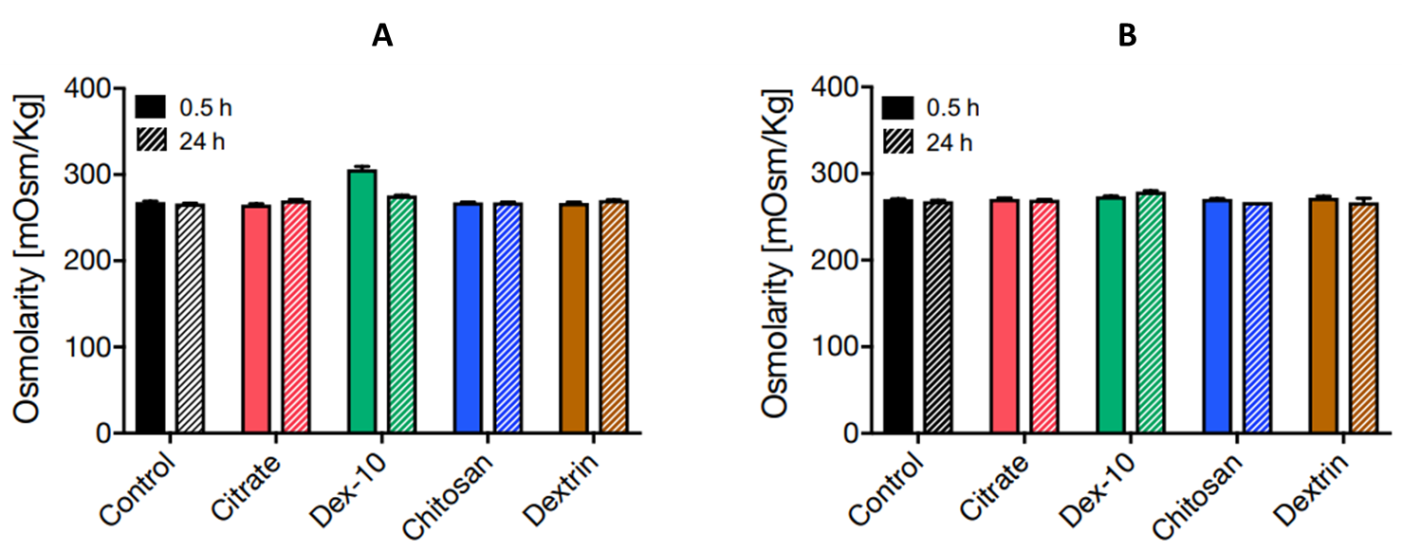


**Figure S5.** Osmolarity of protein poor (A) and protein rich (B) CCM after incubation with different surface-functionalized AuNPs for 0.5 h and 24 h at 37 ºC.


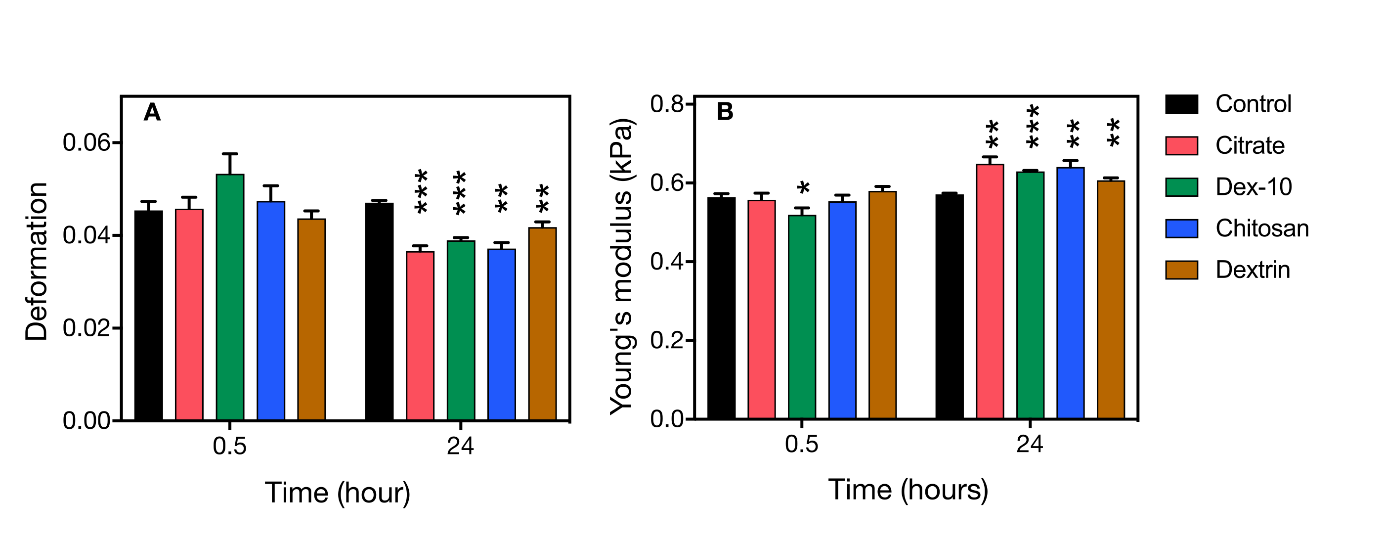


**Figure S6.** Time-dependent mechanical alterations of HL60 cells in presence of AuNPs (50 nM) in RPMI without FCS. Error bars correspond to the standard error of mean.

**
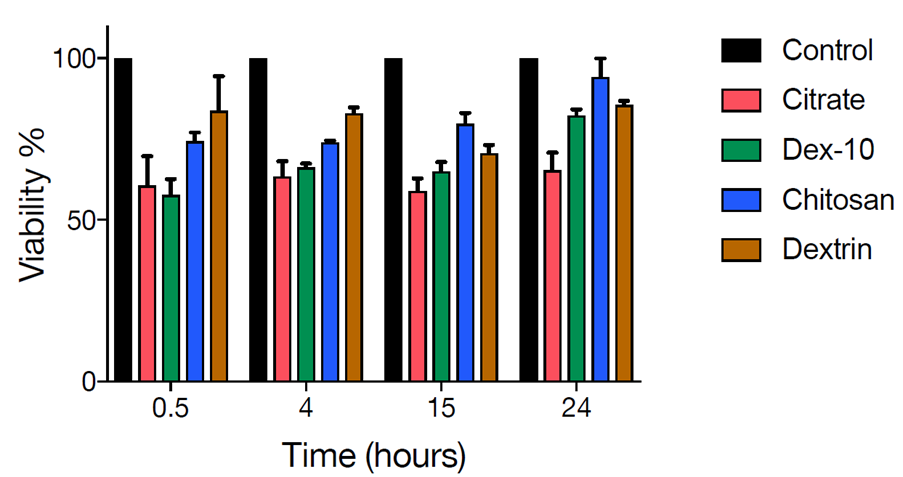
**

**Figure S7.** Time dependent cytotoxicity results of HL 60 cells in presence of different surface-functionalized AuNP (50 nM) in RPMI media without FCS. Error bars correspond to the standard deviation.
